# Supplementary material for: Crystallization of poly(ε-caprolactone) in its immiscible blend with polylactide: insight into the role of annealing histories
Source: Royal Society of Chemistry journal article supplement (doi:10.1039/c6ra07752h), 2016-01-01
Supplement: c6ra07752h1.pdf [file c6ra07752h1.pdf]

## Supporting Information

### **Crystallization of Poly( $\epsilon$ -caprolactone) in Its Immiscible Blend with Polylactide: Insight into the Role of Annealing Histories**

Qiaolian Lv<sup>1,2</sup> Defeng Wu<sup>\*1,2</sup> Hui Xie<sup>1</sup> Sheng Peng<sup>1</sup> Yang Chen<sup>1,2</sup> Chunjiang Xu<sup>1,2</sup>

(<sup>1</sup> School of Chemistry & Chemical Engineering, Yangzhou University, Jiangsu 225002, China)

(<sup>2</sup> Provincial Key Laboratories of Environmental Engineering & Materials, Jiangsu 225002,  
China)

Corresponding author, Tel: +86-514-87975230, Fax: +86-514-87975244, E-mail address:

[dfwu@yzu.edu.cn](mailto:dfwu@yzu.edu.cn)

**Table S1.** The calculated values of interfacial energy ( $\gamma_{12}$ ) of the polymer pairs...S3

**Figure S1.** Optical images of the droplet of distilled water and glycerol on the neat PCL and amorphous and cold-crystallized PLA sheet samples (20 °C).....S4

**Figure S2.** DSC therograms of the neat PCL and its blend samples at various cooling rates.....S5

**Figure S3.** Plots of relative crystallinity ( $X_t\%$ ) versus time for the neat PCL and its blend samples at various cooling rates.....S6

**Table S1.** The calculated values of interfacial energy ( $\gamma_{12}$ ) of the polymer pairs (20 °C)

| $\gamma_{12}$ (mN·m <sup>-1</sup> ) | PCL/amorphous PLA | PCL/crystallized PLA |
|-------------------------------------|-------------------|----------------------|
| geometric-mean <i>eq.</i>           | 4.4               | 0.1                  |
| harmonic-mean <i>eq.</i>            | 8.2               | 0.2                  |

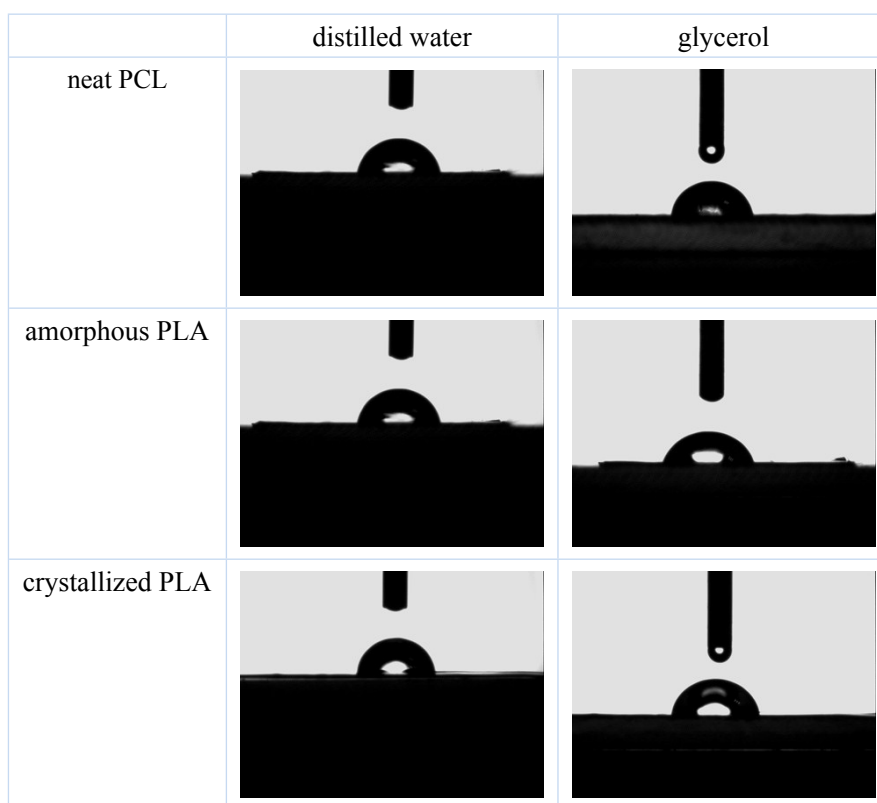

**Figure S1.** Optical images of the droplet of distilled water and glycerol on the neat PCL and amorphous and cold-crystallized PLA sheet samples (20 °C)

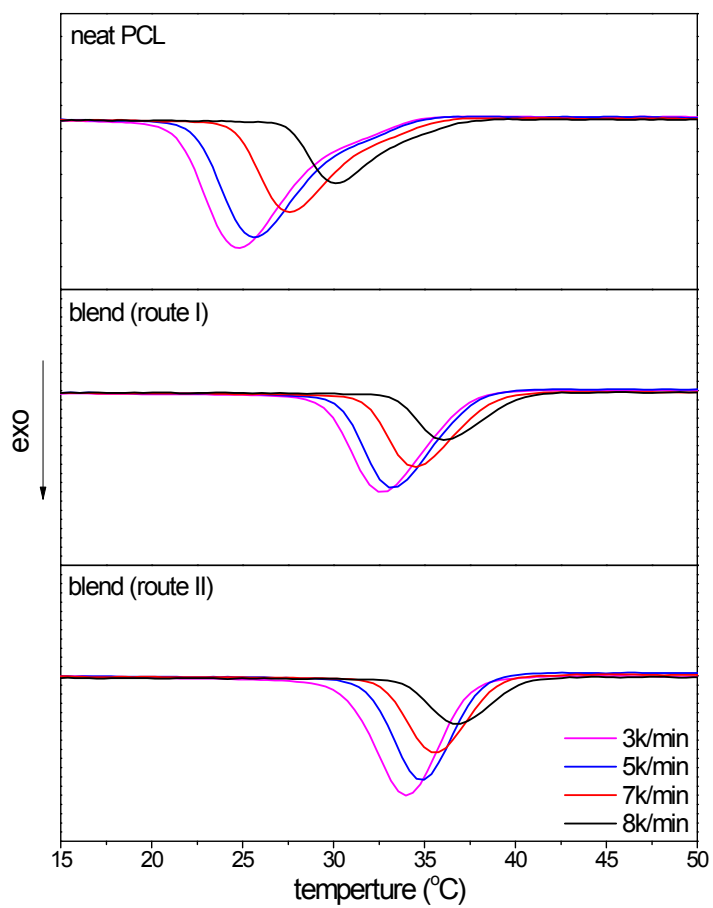

**Figure S2.** DSC thermograms of the neat PCL and its blend samples at various cooling rates

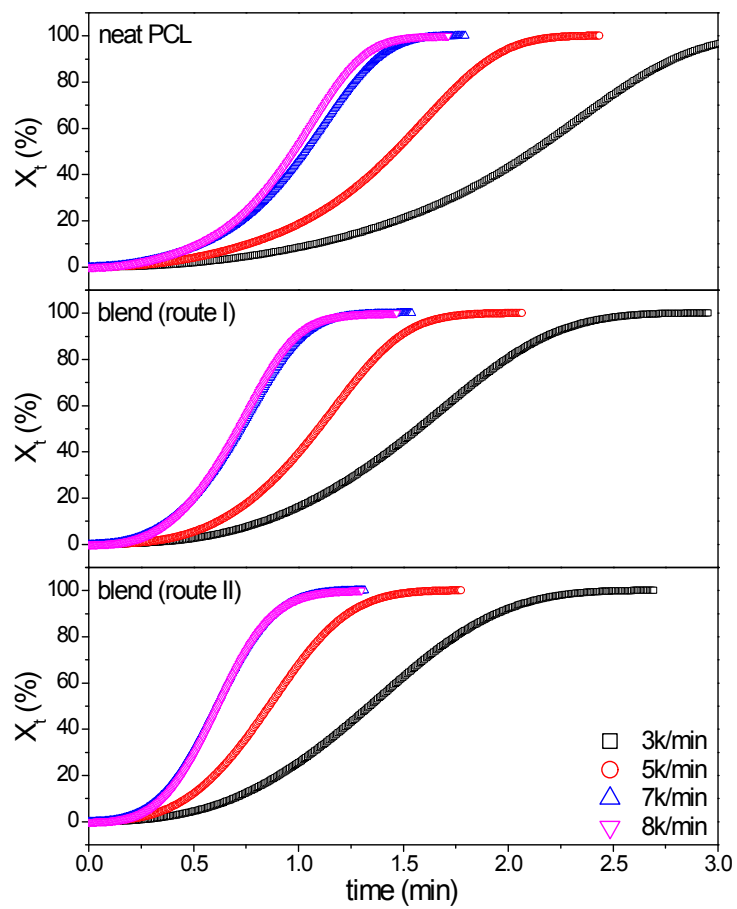

**Figure S3.** Plots of relative crystallinity ( $X_t$ %) versus time for the neat PCL and its blend samples at various cooling rates
